# Supplementary material for: Anion tuning of Zn2+ architectures using a Tris-base salicylic ligand
Source: Royal Society of Chemistry journal article supplement (doi:10.1039/c9ce00749k), 2019-01-01
Supplement: c9ce00749k1.pdf [file c9ce00749k1.pdf]

## Supporting Information

### **Anion tuning of Zn<sup>2+</sup> architectures using a tris-base salicylic ligand**

Daniel J. Fanna,<sup>a,b</sup> Alexander R. Craze,<sup>a</sup> Isaac Etchells,<sup>c</sup> Saroj Bhattacharyya,<sup>d</sup> Jack K. Clegg,<sup>c</sup> Evan G. Moore,<sup>c</sup> Christopher E. Marjo,<sup>d</sup> Adrian Trinchi<sup>e</sup>, Gang Wei<sup>b</sup>, Jason K. Reynolds<sup>a</sup> and Feng Li<sup>a\*</sup>

<sup>a</sup> *School of Science and Health, Western Sydney University, Penrith, NSW 2751, Australia*

<sup>b</sup> *CSIRO Manufacturing, P.O. Box 218, Lindfield, NSW 2070, Australia*

<sup>c</sup> *School of Chemistry and Molecular Biosciences, The University of Queensland, Brisbane St Lucia, QLD 4072, Australia*

<sup>d</sup> *Mark Wainwright Analytical Centre, University of New South Wales, NSW 2052, Australia*

<sup>e</sup> *CSIRO Manufacturing, Private Bag 33, Clayton, VIC 3169, Australia*

\* Corresponding author:

E-mail: Feng.Li@westernsydney.edu.au (F. Li).

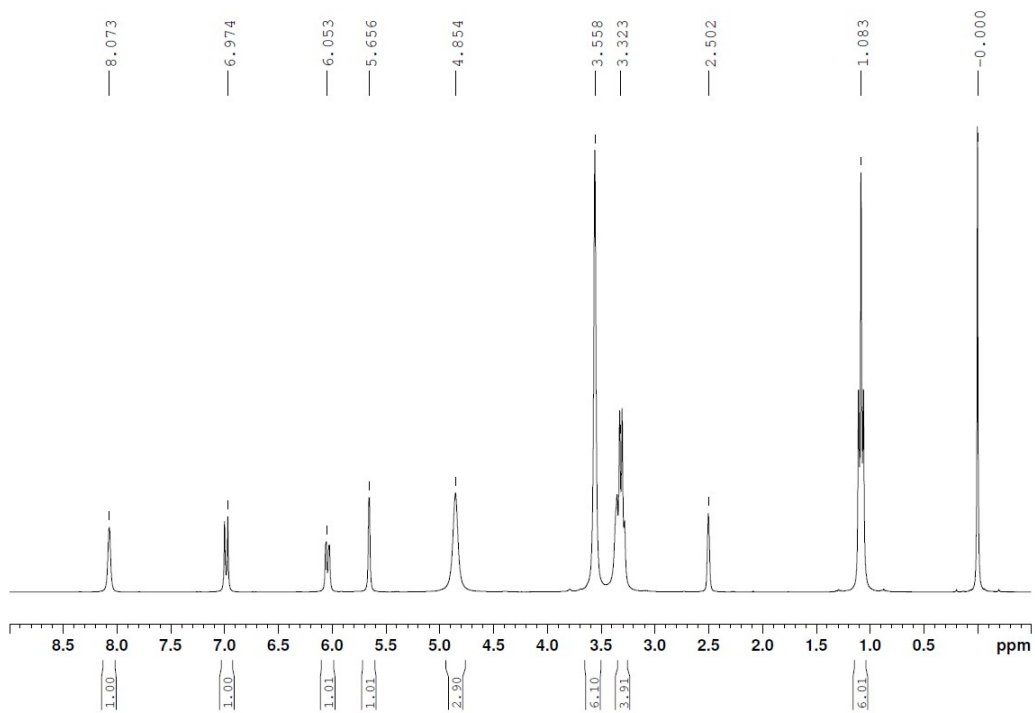

**Fig. S1**  $^1\text{H}$  NMR  $\text{H}_4\text{L}$ .

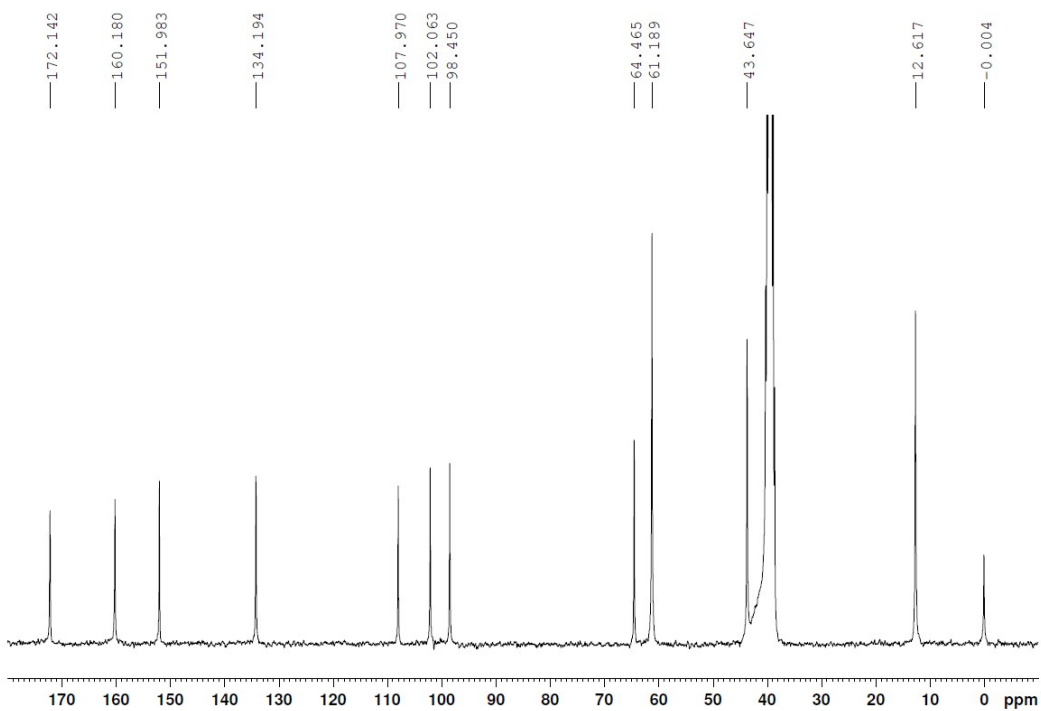

**Fig. S2**  $^{13}\text{C}$  NMR of  $\text{H}_4\text{L}$ .

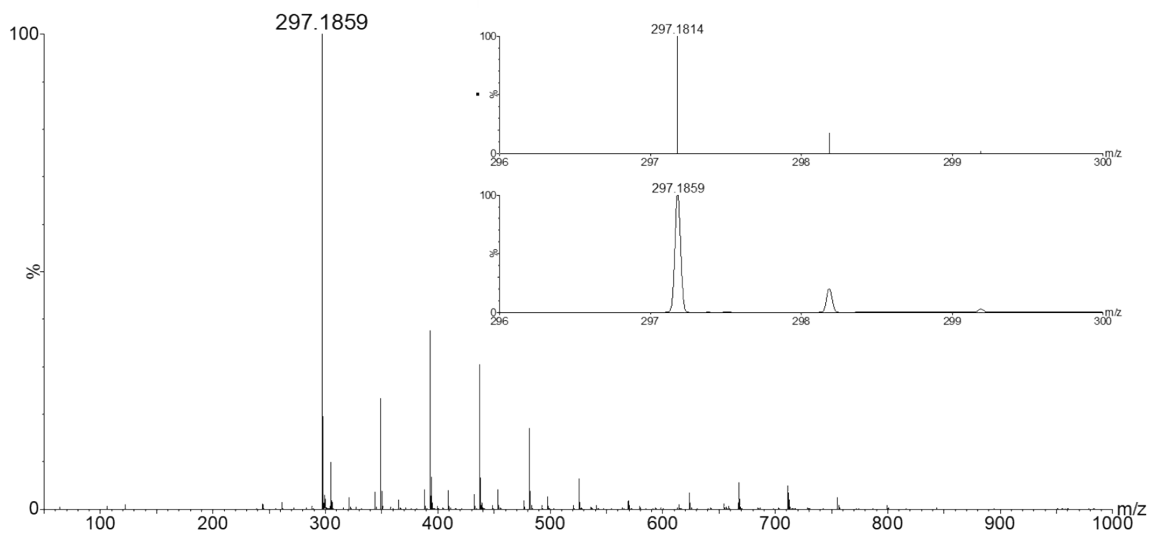

**Fig. S3** ESI-HRMS (positive-ion detection, MeOH,  $m/z$ ): calculated for  $[H_4L+H]^+$ , 297.1814; found 297.1859. Insert, theoretical isotope model (top) and measured isotope distribution (bottom).

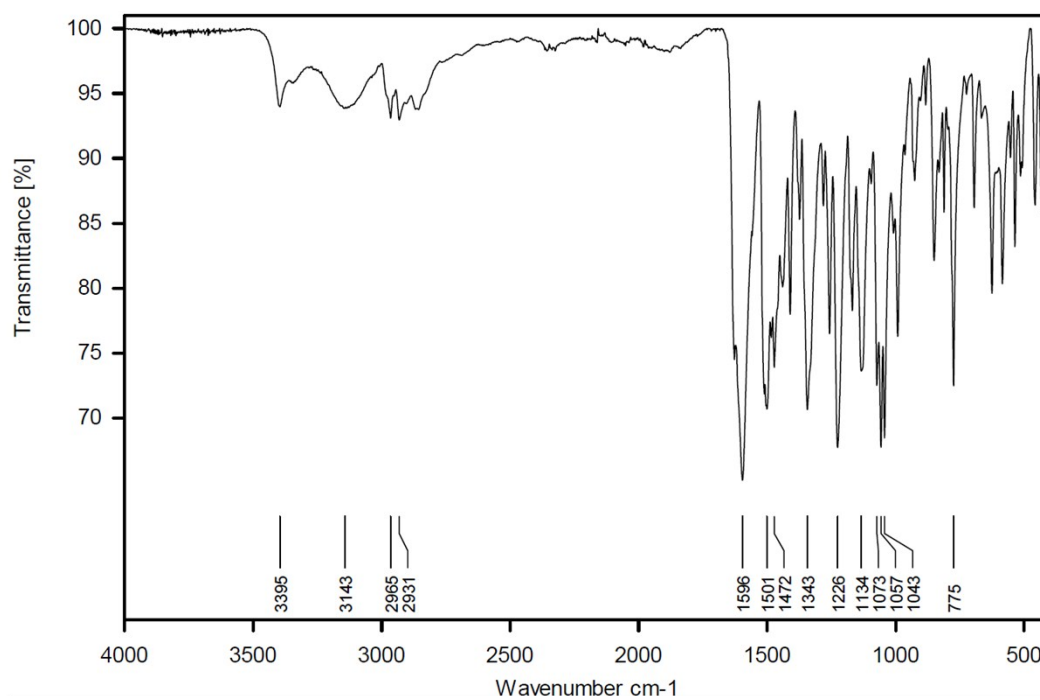

**Fig. S4** FT-IR of  $H_4L$ .

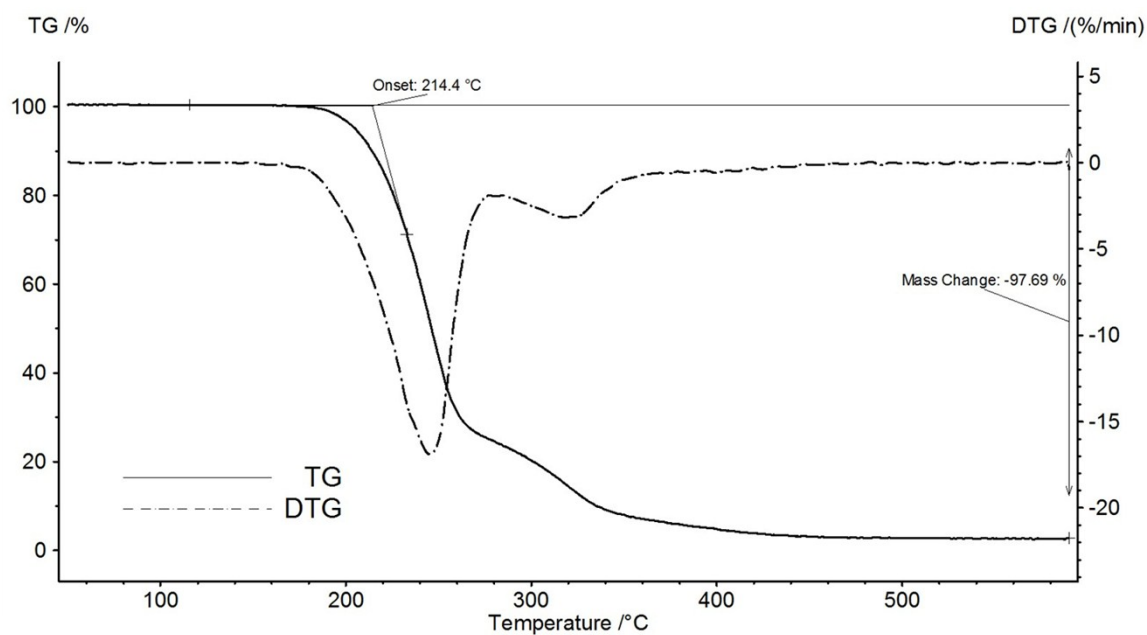

**Fig. S5** TGA spectrum of H<sub>4</sub>L under argon gas measured from 50-590 °C at 10 °C per/min. Solid line (TG) is the samples thermogravimetric mass loss, while DTG is the first derivative of TG.

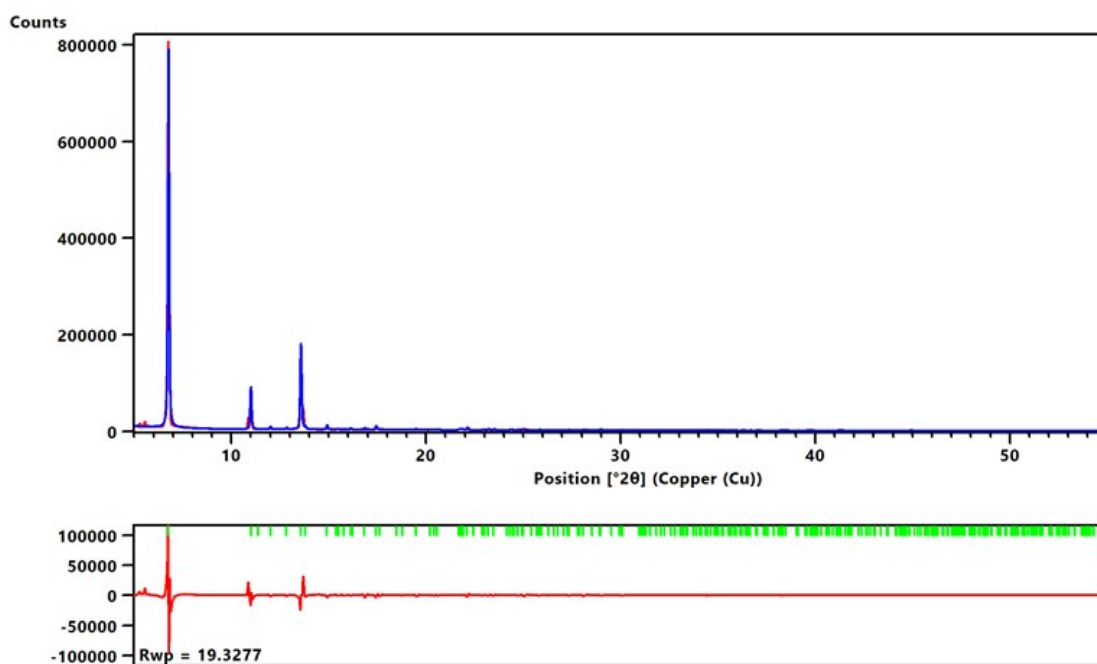

**Fig. S6** LeBail fit of complex **1**. The top portion in the figure displays overlap of PXRD experimental pattern of the complex (in red) and the calculated pattern from the crystal structure (in blue). The plot below is the difference between the two patterns.

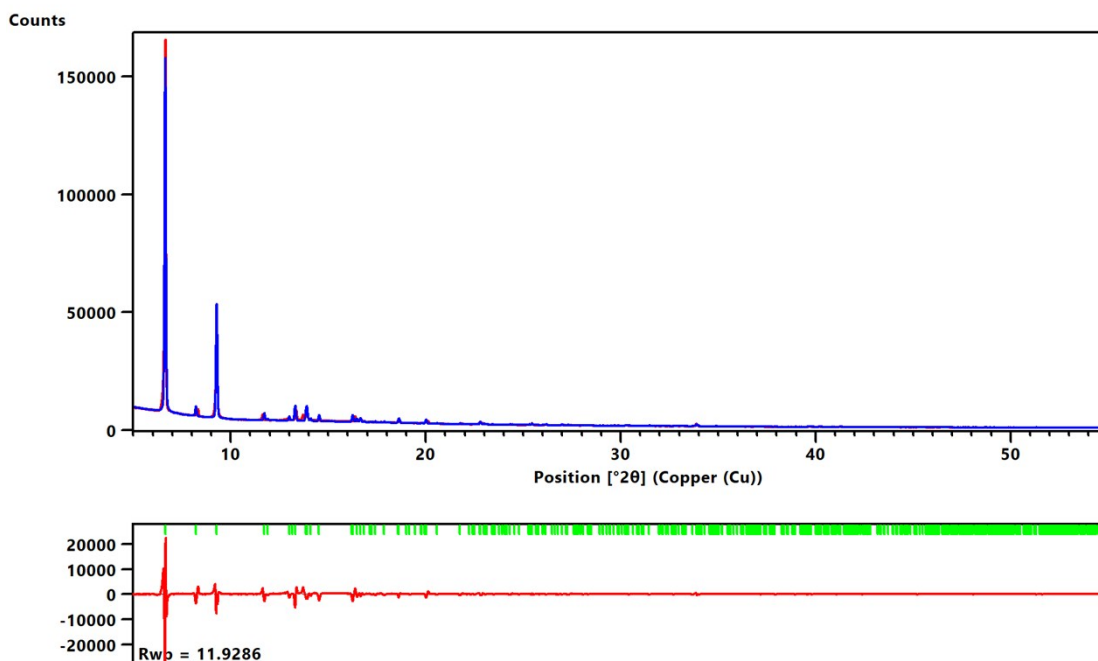

**Fig. S7** LeBail fit of complex **2**. The top portion in the figure displays overlap of PXRD experimental pattern of the complex (in red) and the calculated pattern from the crystal structure (in blue). The plot below is the difference between the two patterns.

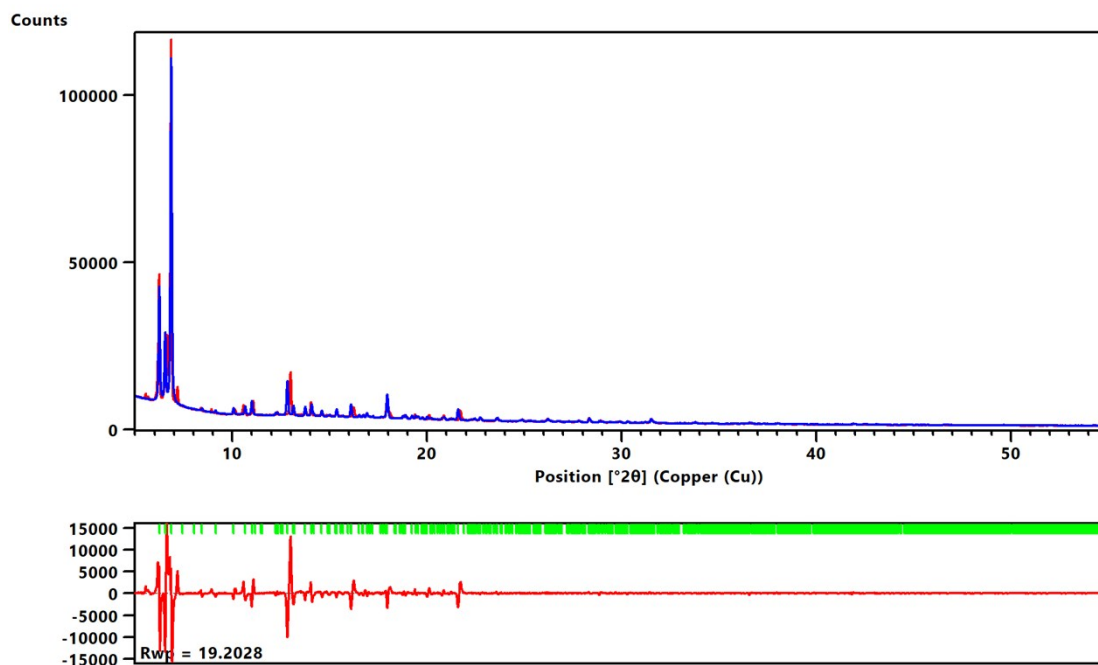

**Fig. S8** LeBail fit of complex **3**. The top portion in the figure displays overlap of PXRD experimental pattern of the complex (in red) and the calculated pattern from the crystal structure (in blue). The plot below is the difference between the two patterns.

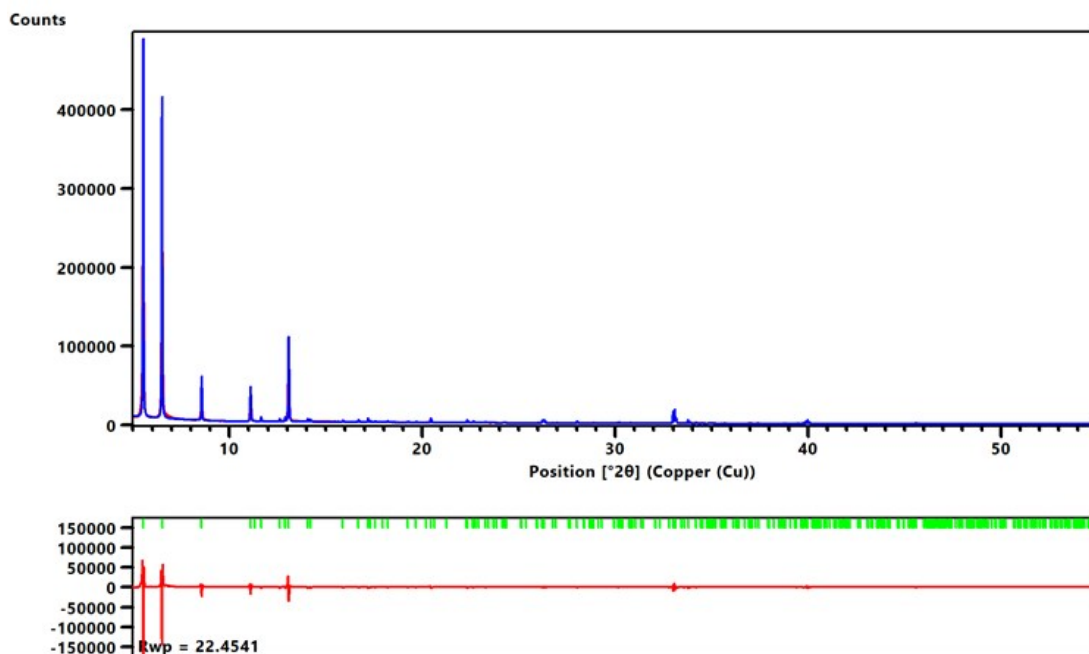

**Fig. S9** LeBail fit of complex **4**. The top portion in the figure displays overlap of PXRD experimental pattern of the complex (in red) and the calculated pattern from the crystal structure (in blue). The plot below is the difference between the two patterns.

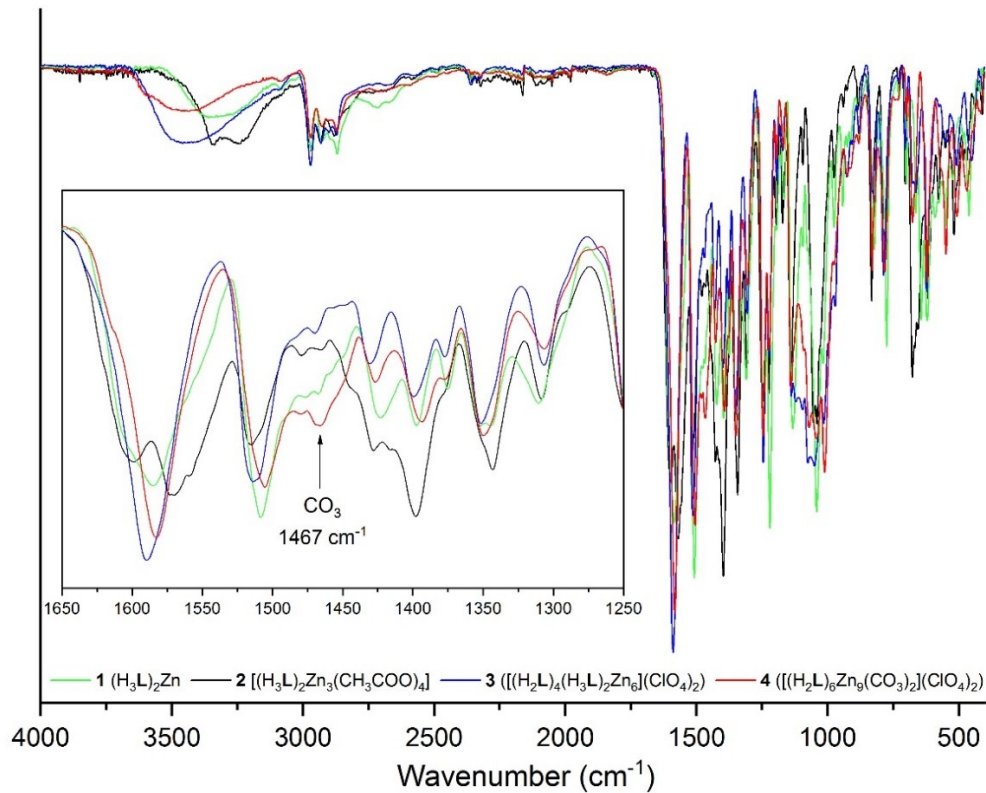

**Fig. S10** FT-IR of  $\text{Zn}^{2+}$  complexes with  $\text{H}_4\text{L}$ . The presence of  $\text{CO}_3$  in the architecture of **4** is supported by a peak at  $1467\text{ cm}^{-1}$ .

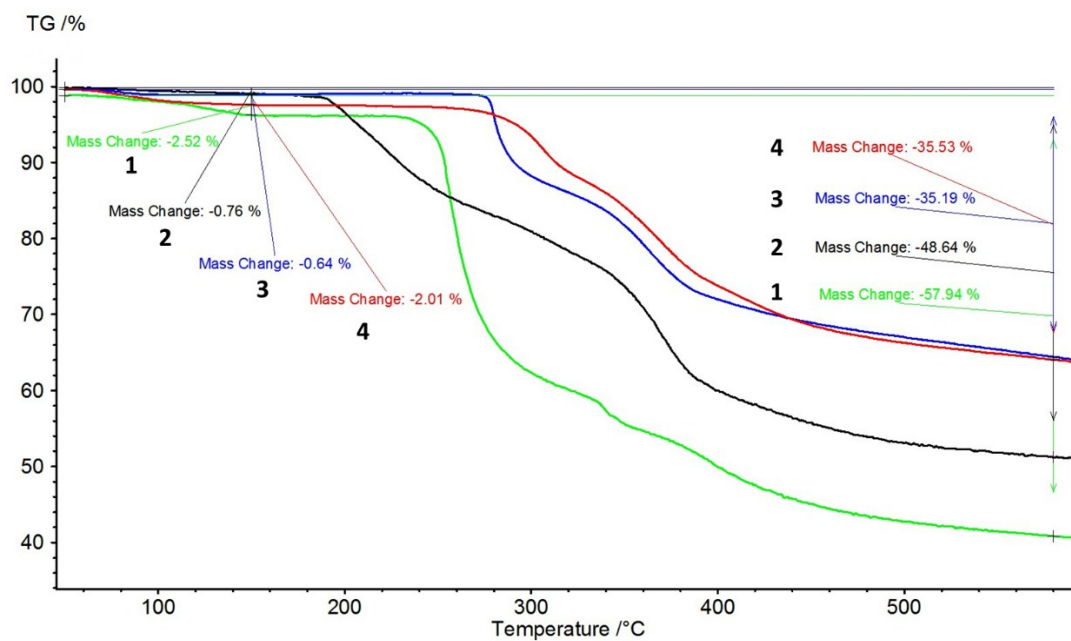

**Fig. S11** TGA spectra of Zn<sup>2+</sup> complexes under argon gas measured from 50-590 °C at 10 °C per/min. The first mass loss event calculated is from 50-150 °C and accounts for solvent loss, while the second is calculated from 50-590 °C.

## Crystallographic information

### Complex 1

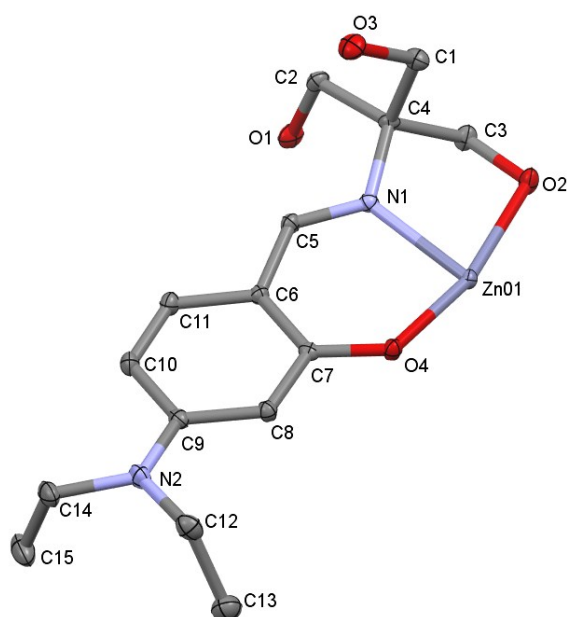

**Fig. S12** Asymmetric unit of **1** with thermal ellipsoids drawn at 50% probability. Hydrogen atoms, solvent molecules and anions omitted for clarity.

### Complex 2

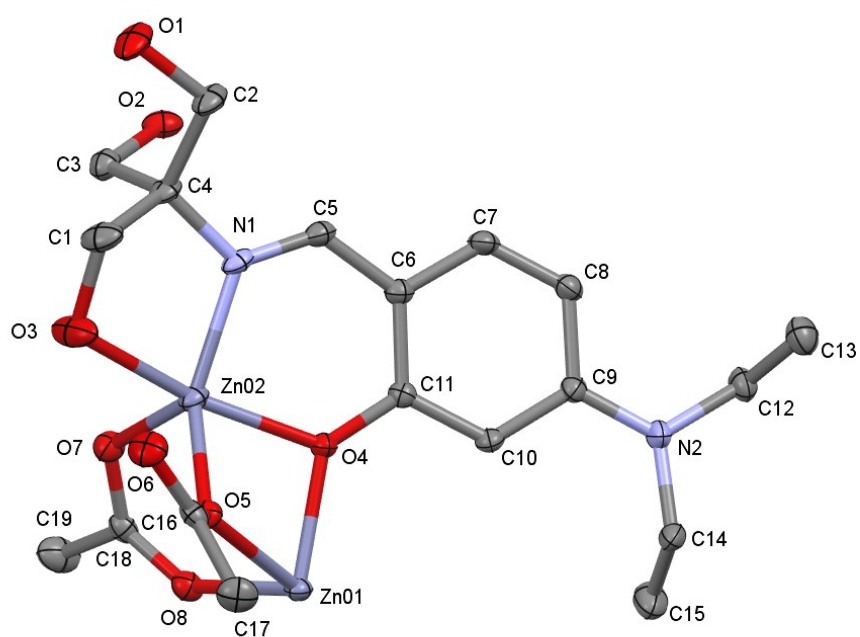

**Fig. S13** Asymmetric unit of **2** with thermal ellipsoids drawn at 50% probability. Hydrogen atoms, solvent molecules and anions omitted for clarity.



*Specific details:*

One of the ethyl groups is disordered over two positions and modelled with occupancies of 0.75 and 0.25 respectively. There is also a disordered methanol solvent molecule present in the lattice, which is modelled over three positions. A number of the solvent methyl hydrogens give rise to close contacts with ligand hydrogen atoms. Attempts to model the solvent with the O/C positions swapped did not give satisfactory results.

**Complex 3**

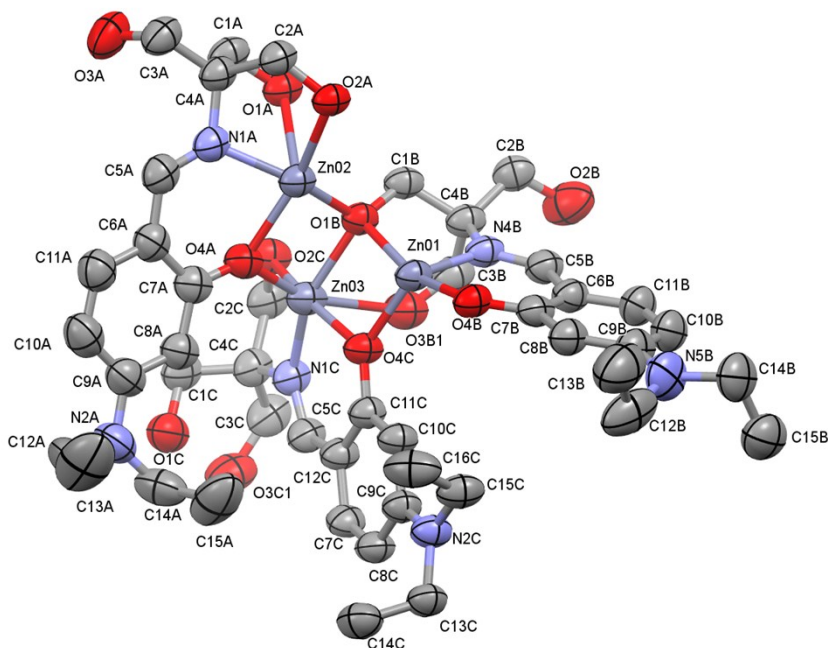

**Fig. S14** Asymmetric unit of **3** with thermal ellipsoids drawn at 50% probability. Hydrogen atoms, solvent molecules and anions omitted for clarity.

*Specific details:*

One of the ethyl groups and two of the methoxy groups are disordered over two positions. In addition the perchlorate anions are significantly disordered and instead of modelling them, this region of the structure was treated with the solvent masking routine of OLEX2. A number of restraints and constraints were required to facilitate realistic modelling.

## Complex 4

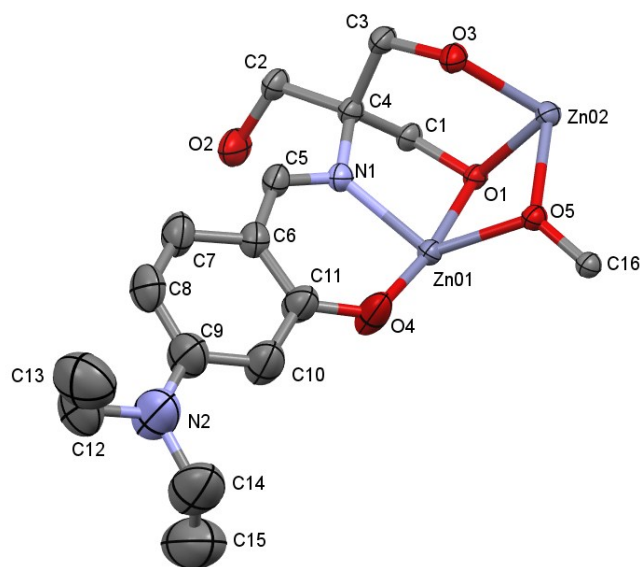

**Fig. S15** Asymmetric unit of **4** with thermal ellipsoids drawn at 50% probability. Hydrogen atoms, solvent molecules and anions omitted for clarity.

### *Specific details:*

The ligand is disordered over two positions (occupancy 0.75 and 0.25, respectively). In addition one solvent position is a mixture of methanol (0.75) and water (0.25). A number of restraints and constraints were required to facilitate realistic modelling.
